# Supplementary material for: Hierarchical spheres of Mg–Al LDH for the removal of phosphate ions: effect of alumina polymorph as precursor
Source: Royal Society of Chemistry journal article supplement (doi:10.1039/c9ce01064e), 2019-01-01
Supplement: c9ce01064e1.pdf [file c9ce01064e1.pdf]

## Supporting Information

### **Hierarchical Spheres of Mg-Al LDH for Removal of Phosphate Ions: Effect of Alumina Polymorph as Precursor**

Tomohito Sudare,<sup>a</sup> Atsushi Zenzai,<sup>b</sup> Shuhei Tamura,<sup>b</sup> Masahiro Kiyama,<sup>b</sup> Fumitaka Hayashi,<sup>b</sup> and Katsuya Teshima<sup>a,b†</sup>

<sup>†</sup>Research Initiative for Supra-Materials, Shinshu University, Japan Nagano 380-8553,  
Japan

<sup>§</sup>Department of Materials Chemistry, Faculty of Engineering, Shinshu University, 4-17-  
1 Wakasato, Nagano 380-8553, Japan

\*E-mail: [teshima@shinshu-u.ac.jp](mailto:teshima@shinshu-u.ac.jp)

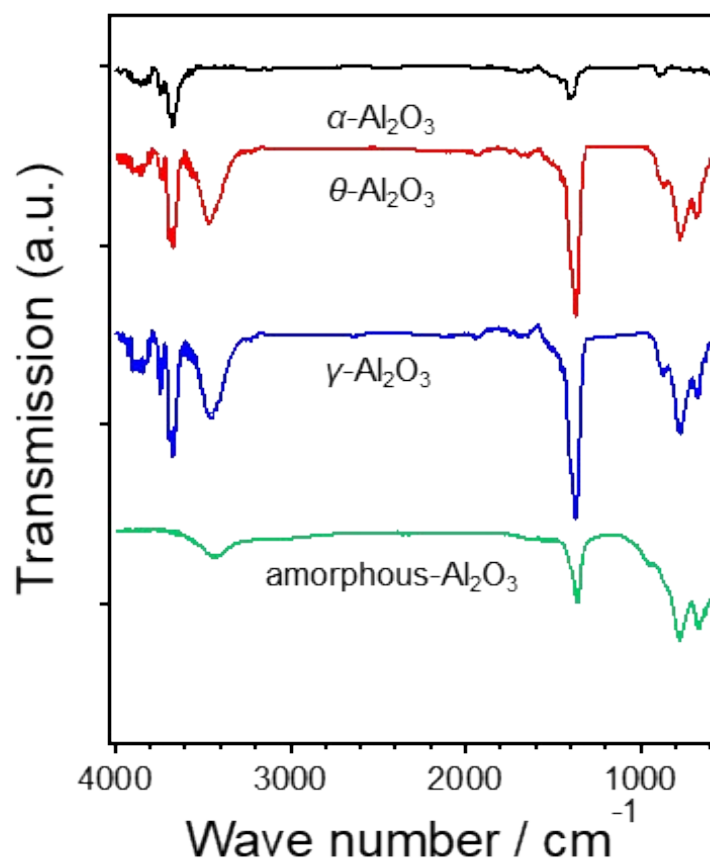

**Figure S1.** FT-IR spectra of powders collected from reaction solution containing Al<sub>2</sub>O<sub>3</sub> precursor and MgO after 120 h ( $\alpha$ -Al<sub>2</sub>O<sub>3</sub>,  $\theta$ -Al<sub>2</sub>O<sub>3</sub>,  $\gamma$ -Al<sub>2</sub>O<sub>3</sub>, and amorphous Al<sub>2</sub>O<sub>3</sub> were used as precursors).

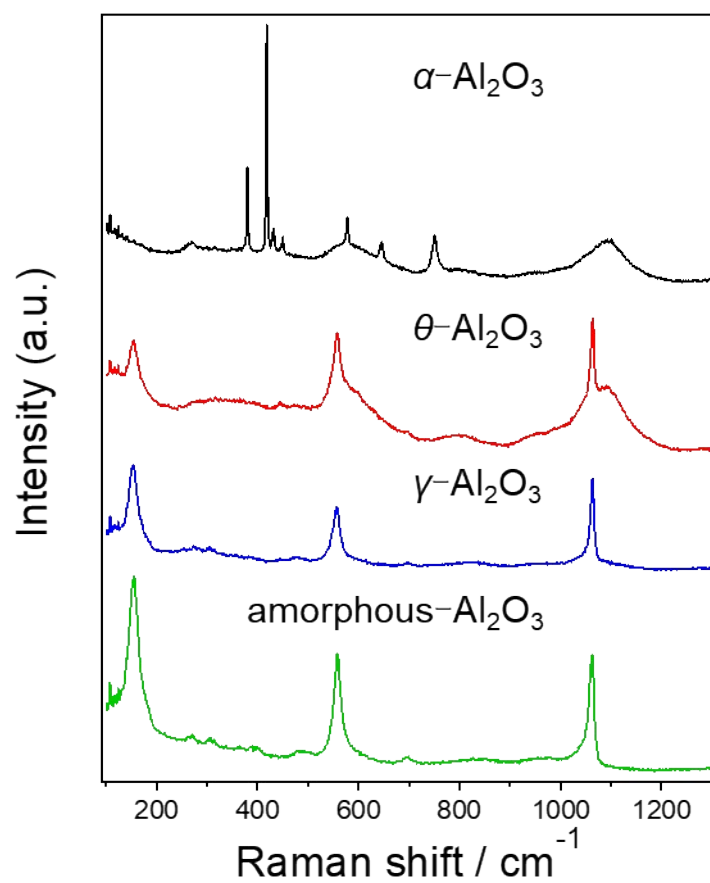

**Figure S2.** Raman spectra of powders collected from reaction solution containing Al<sub>2</sub>O<sub>3</sub> precursor and MgO after 120 h ( $\alpha$ -Al<sub>2</sub>O<sub>3</sub>,  $\theta$ -Al<sub>2</sub>O<sub>3</sub>,  $\gamma$ -Al<sub>2</sub>O<sub>3</sub>, and amorphous Al<sub>2</sub>O<sub>3</sub> were used as precursors).

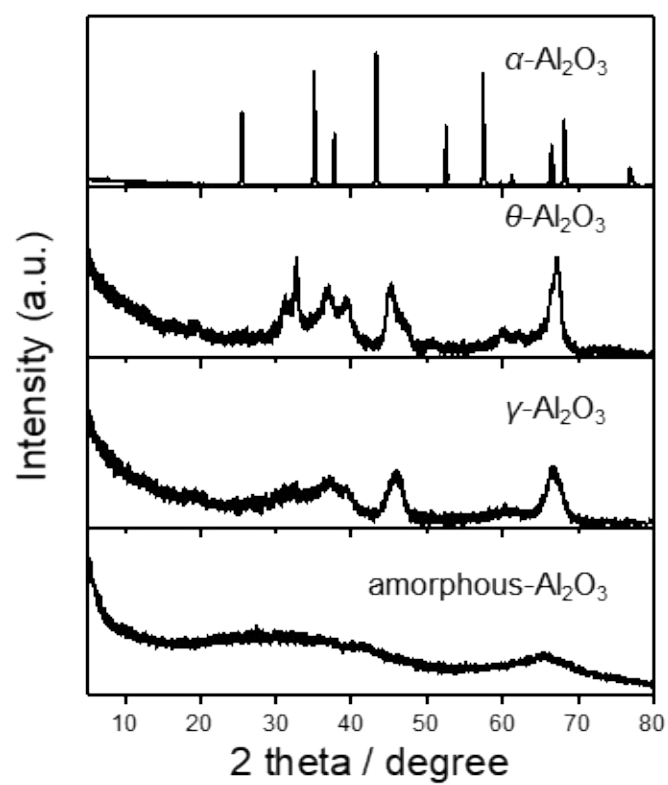

**Figure S3.** XRD patterns of (a)  $\alpha\text{-Al}_2\text{O}_3$ , (b)  $\theta\text{-Al}_2\text{O}_3$ , (c)  $\gamma\text{-Al}_2\text{O}_3$ , and (d) amorphous- $\text{Al}_2\text{O}_3$  used as precursors.

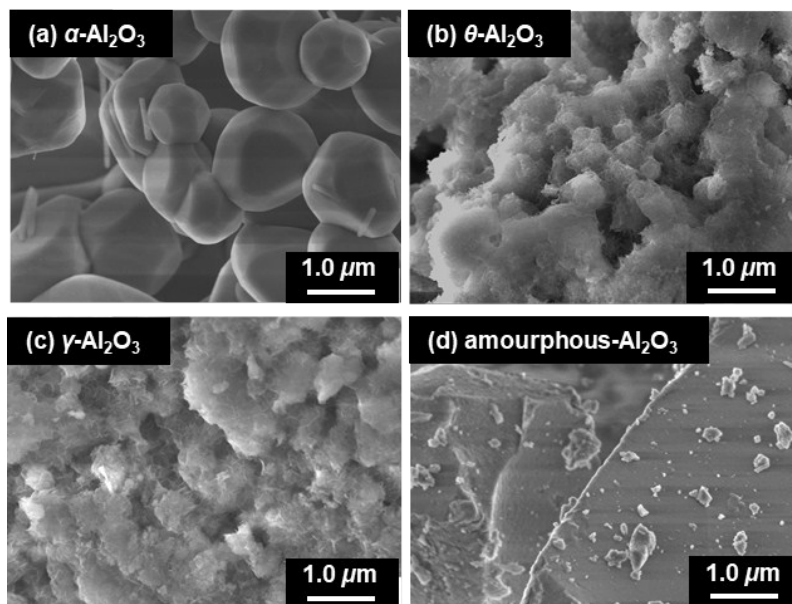

**Figure S4.** SEM images of (a)  $\alpha\text{-Al}_2\text{O}_3$ , (b)  $\theta\text{-Al}_2\text{O}_3$ , (c)  $\gamma\text{-Al}_2\text{O}_3$ , and (d) amorphous- $\text{Al}_2\text{O}_3$  used as precursors.

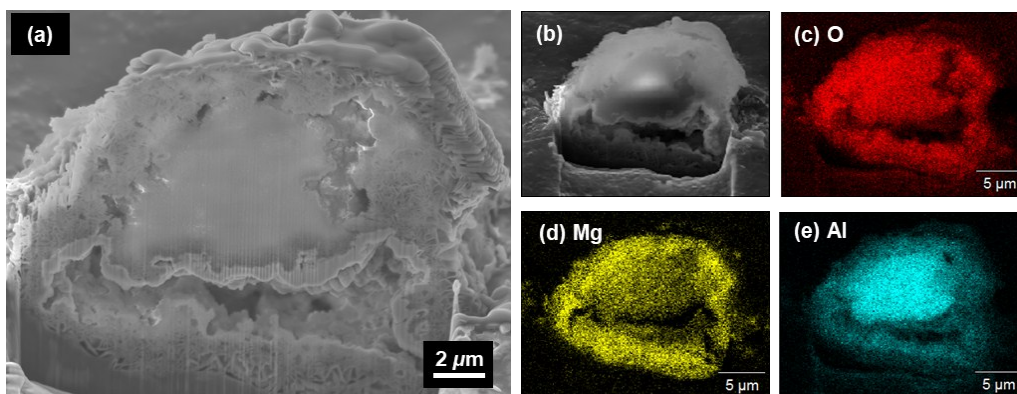

**Figure S5.** (a) Cross-sectional SEM images and (b-e) elemental maps of LDH particles prepared using  $\gamma$ - $\text{Al}_2\text{O}_3$ .

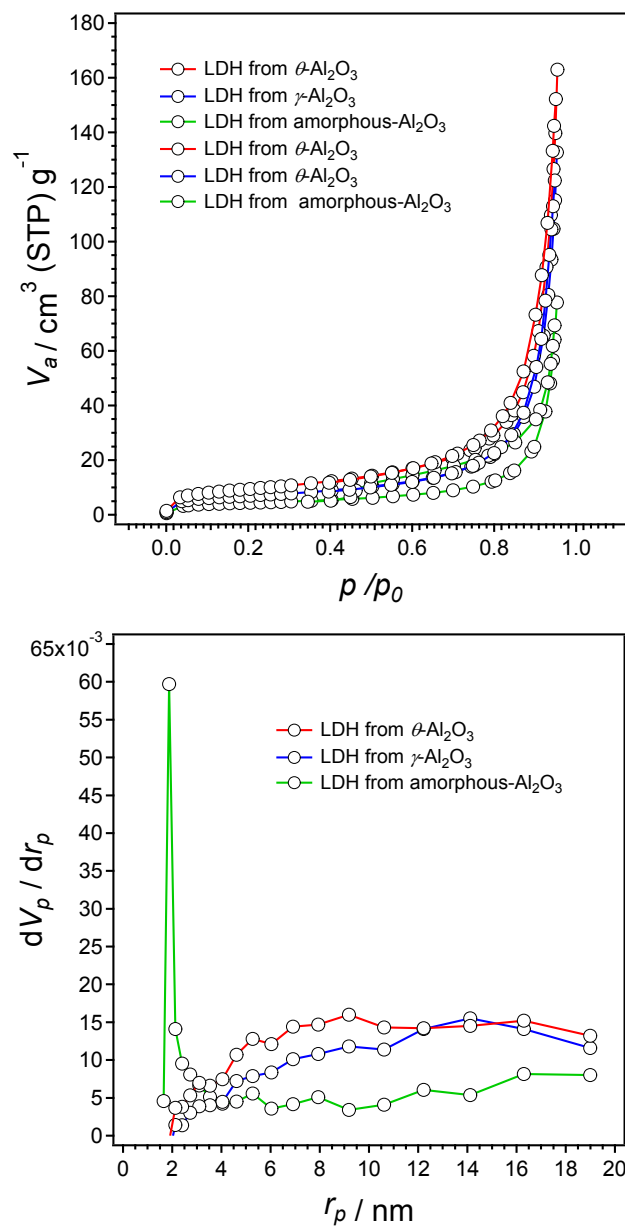

**Figure S6.** (top)  $\text{N}_2$  adsorption/desorption isotherms and (bottom) pore-size distribution of powders collected from reaction solution containing  $\text{Al}_2\text{O}_3$  precursor and  $\text{MgO}$  after 120 h ( $\theta\text{-Al}_2\text{O}_3$ ,  $\gamma\text{-Al}_2\text{O}_3$ , and amorphous  $\text{Al}_2\text{O}_3$  were used as precursors).

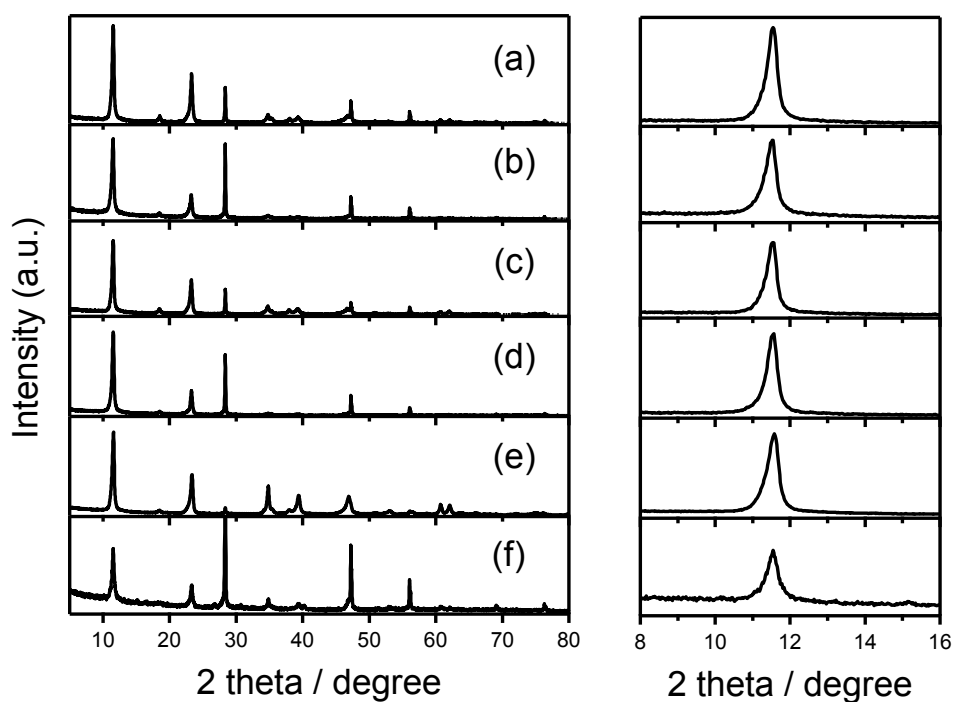

**Figure S7.** XRD patterns of LDH powders (a, c, e) before and (b, d, f) after replacement of interlayer anionic species in LDH particles with Cl<sup>-</sup> ions (PDF 0511525, and PDF 08301141 were obtained from ICDD database); (a, b)  $\theta$ -Al<sub>2</sub>O<sub>3</sub>, (c, d)  $\gamma$ -Al<sub>2</sub>O<sub>3</sub>, and (e, f) amorphous-Al<sub>2</sub>O<sub>3</sub> were used as precursors.



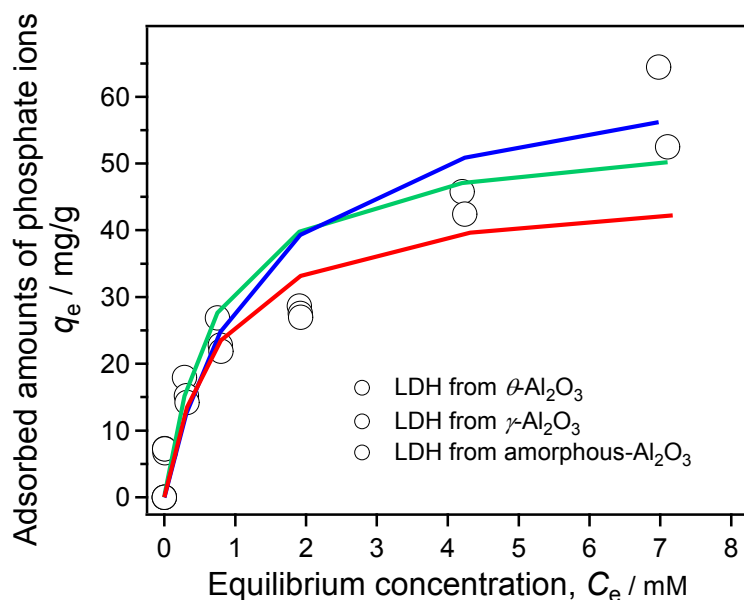

**Figure S8.** Adsorption isotherms for phosphate ions with respect to LDH prepared using  $\theta$ - $Al_2O_3$ ,  $\gamma$ - $Al_2O_3$ , and amorphous- $Al_2O_3$  were used as precursors after replacement of interlayer anionic species in LDH particles with  $Cl^-$  ions. The value of the Langmuir constant,  $b_L$  (1.25, 0.74, and 1.32 mM), and the maximum amount of adsorbate, phosphate ions here, corresponding to the Langmuir model,  $q_L$  (64.95, 67.11, and 55.56  $mg\ g^{-1}$ ), sums of the mean squared errors for the Langmuir model,  $R^2$  (0.95, 0.86, and 0.96) with respects to LDH prepared from  $\theta$ - $Al_2O_3$ ,  $\gamma$ - $Al_2O_3$ , amorphous- $Al_2O_3$ , respectively.

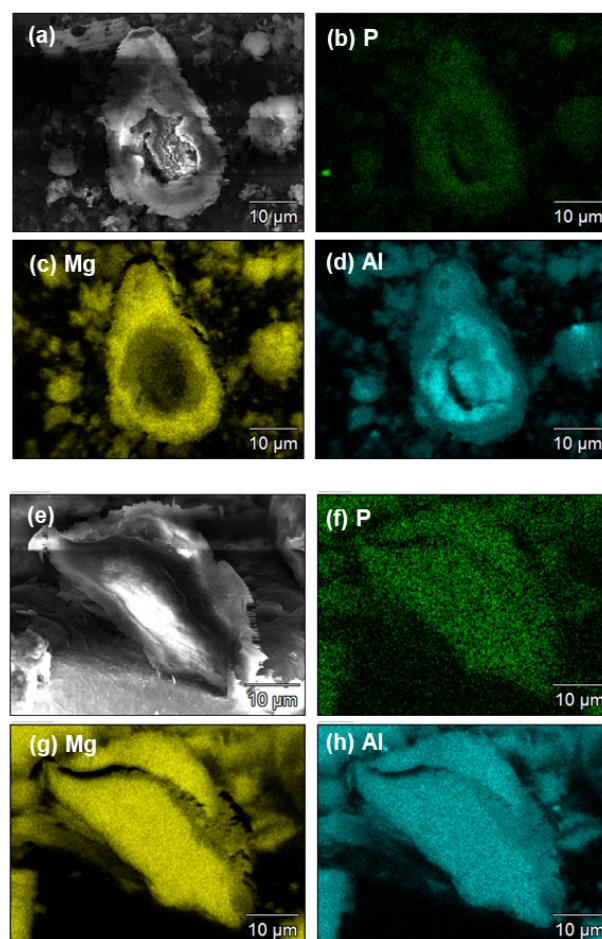

**Figure S9.** (a, e) Cross-sectional SEM images and (b-d, f-h) elemental maps of LDH particles prepared from (a-e)  $\theta$ - $\text{Al}_2\text{O}_3$  and (f-j)  $\gamma$ - $\text{Al}_2\text{O}_3$ . Images and maps were obtained after  $\text{HPO}_4^{2-}$  ion adsorption test.
